# Supplementary material for: Inbreeding shapes the evolution of marine invertebrates
Source: PubMed Central journal article supplement (PMC7383701; doi:10.1111/evo.13951), 2020-04-07

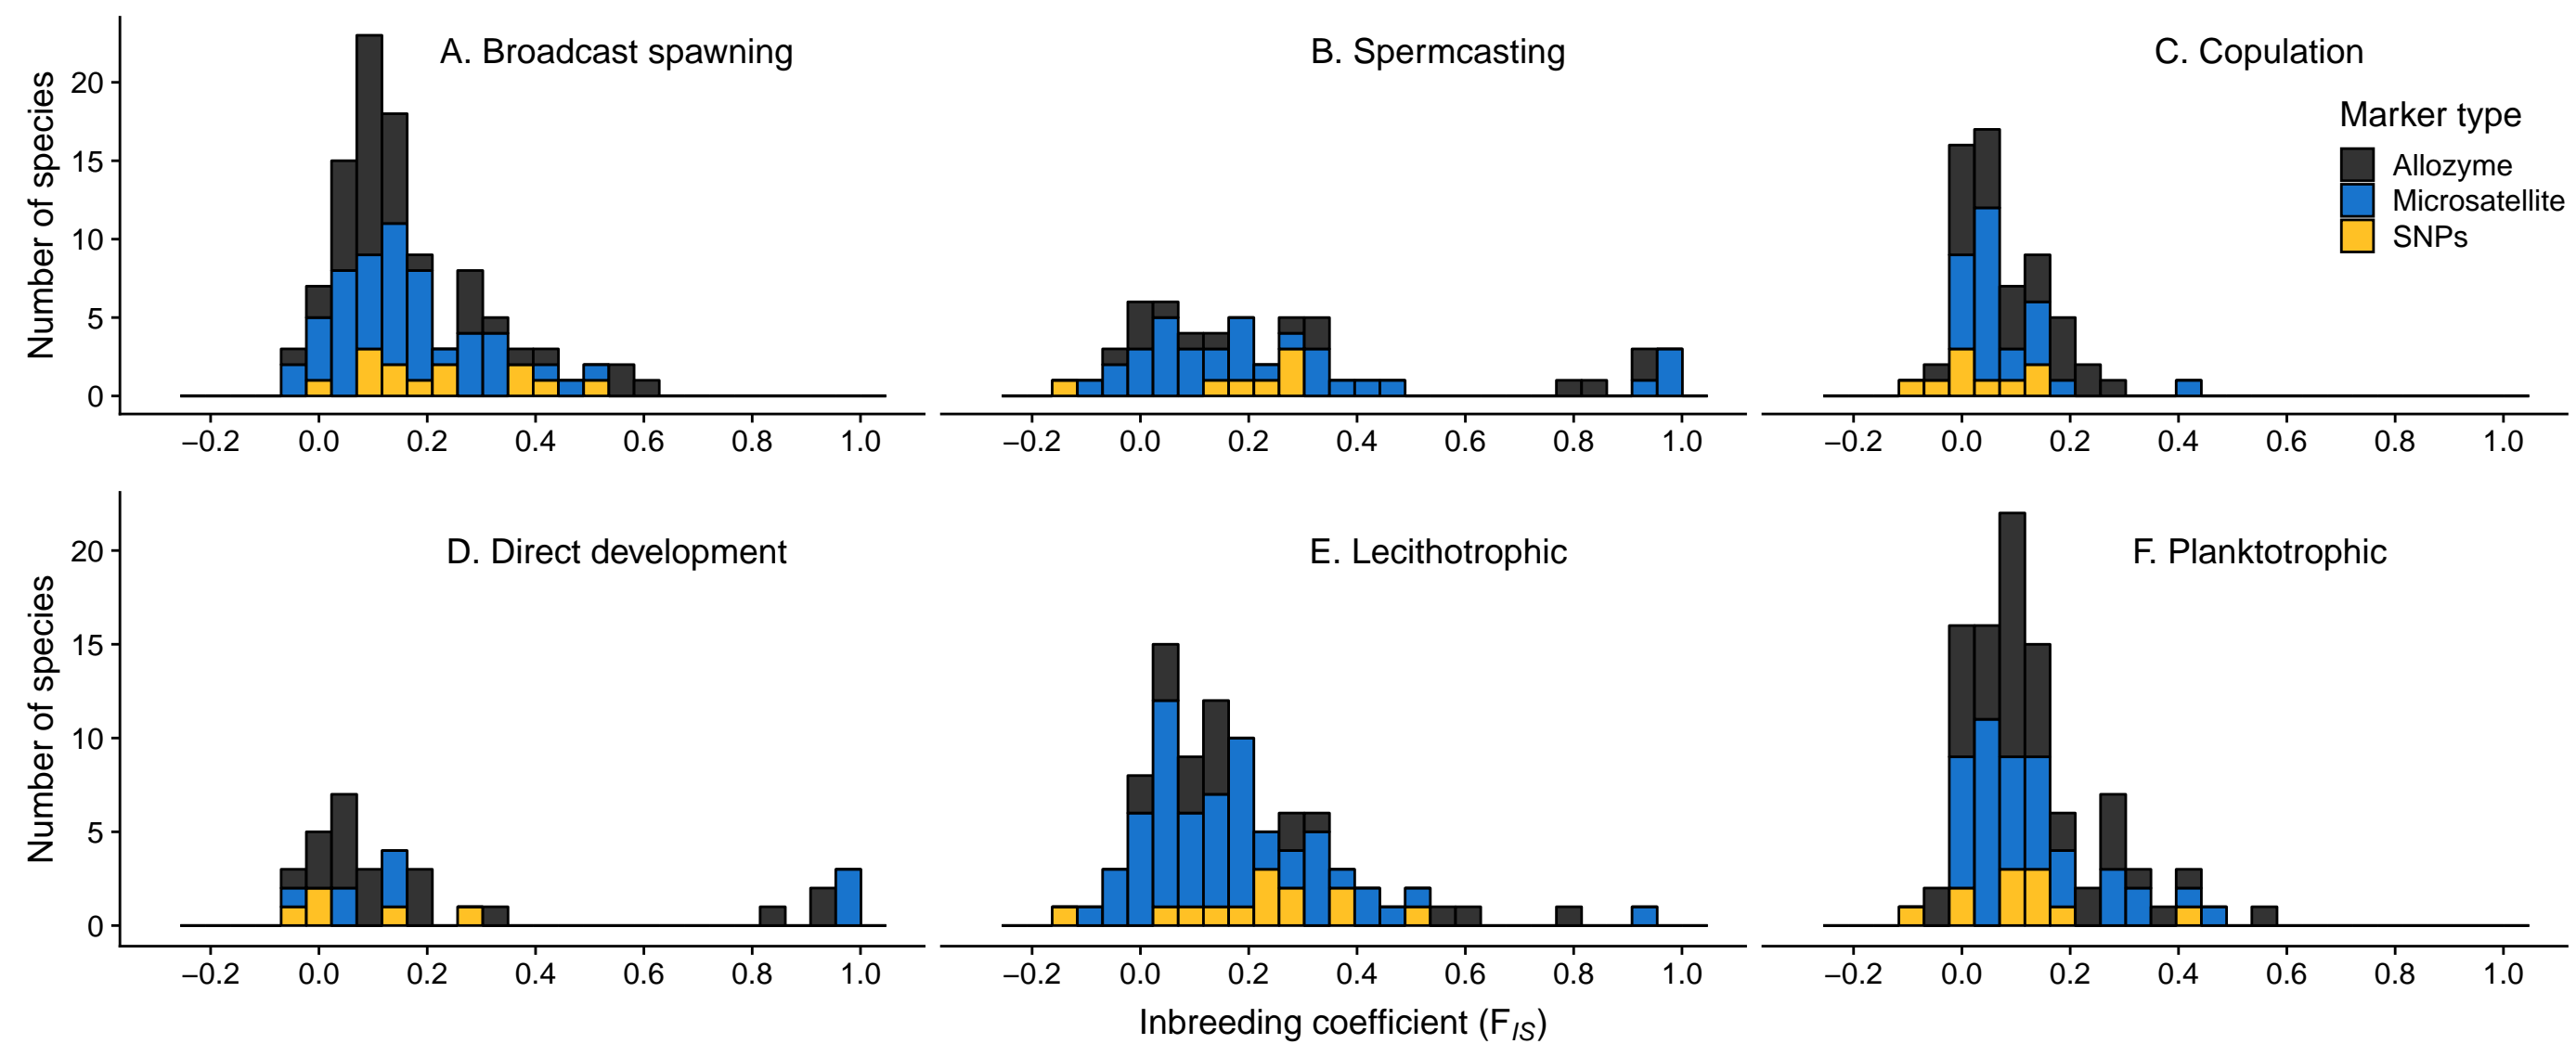

Supplement: EVO-74-871-s004.pdf [file EVO-74-871-s004.pdf]
